# Supplementary material
Source: publisher figshare collection journal article supplement (https://plos.figshare.com/articles/dataset/_/122762)
Supplement: Supplementary file [file 1]

**Table S2: *Drosophila* mRNA versus protein expression: domain width.** This table shows domain widths for trunk gap genes. Numbers are given in % egg length. mRNA expression is shown in black, protein expression in grey. *Drosophila* values are calculated from [1]. Single dashes indicate boundaries that are not present at a given time point. Double dashes indicate boundaries that are observable, but were not measured in [1].

| Domain<br>Time class | <i>gt</i><br>anterior | <i>Kr</i><br>central | <i>kni</i><br>abdominal | <i>gt</i><br>posterior | <i>hb</i><br>posterior |
|----------------------|-----------------------|----------------------|-------------------------|------------------------|------------------------|
| <b>C13</b>           | 20.5<br>--            | 12.7<br>--           | 13.7<br>--              | 26.0<br>--             | 10.5<br>-              |
| <b>T1</b>            | 18.6<br>21.1          | 12.5<br>18.1         | 13.6<br>15.2            | 12.4<br>17.4           | 15.0<br>-              |
| <b>T2</b>            | 18.2<br>19.5          | 13.0<br>17.5         | 12.2<br>12.8            | 9.6<br>15.0            | 11.0<br>--             |
| <b>T3</b>            | 19.1<br>19.8          | 14.3<br>16.0         | 12.0<br>11.7            | 9.4<br>13.0            | 9.2<br>12.3            |
| <b>T4</b>            | 19.5<br>20            | 13.8<br>15.9         | 10.2<br>11.0            | 10.0<br>11.1           | 9.1<br>12.2            |
| <b>T5</b>            | 19.4<br>20.2          | 12.8<br>15.7         | 10.0<br>11.0            | 9.7<br>10.5            | 10.8<br>11.8           |
| <b>T6</b>            | 18.5<br>20.4          | 12.9<br>15.6         | 10.3<br>10.6            | 9.5<br>10.2            | 11.6<br>11.3           |
| <b>T7</b>            | 17.9<br>19.4          | 9.5<br>14.7          | 8.5<br>10.4             | 7.6<br>9.6             | 10.5<br>10.2           |
| <b>T8</b>            | 16.7<br>19.6          | 9.8<br>13.9          | 8.9<br>10.5             | 7.5<br>8.6             | 10.3<br>10.2           |

[1] Surkova S, Kosman D, Kozlov K, Manu, Myasnikova E, et al. (2008) Characterization of the *Drosophila* segment determination morphome. Dev Biol 313: 844-862.
